# Supplementary material
Source: Springer Nature journal article supplement (https://www.springermedizin.de/resource/supplementary/12943_2011_1022_MOESM1_ESM.pdf/9552068)
Supplement: MOESM1 [file 9552068]

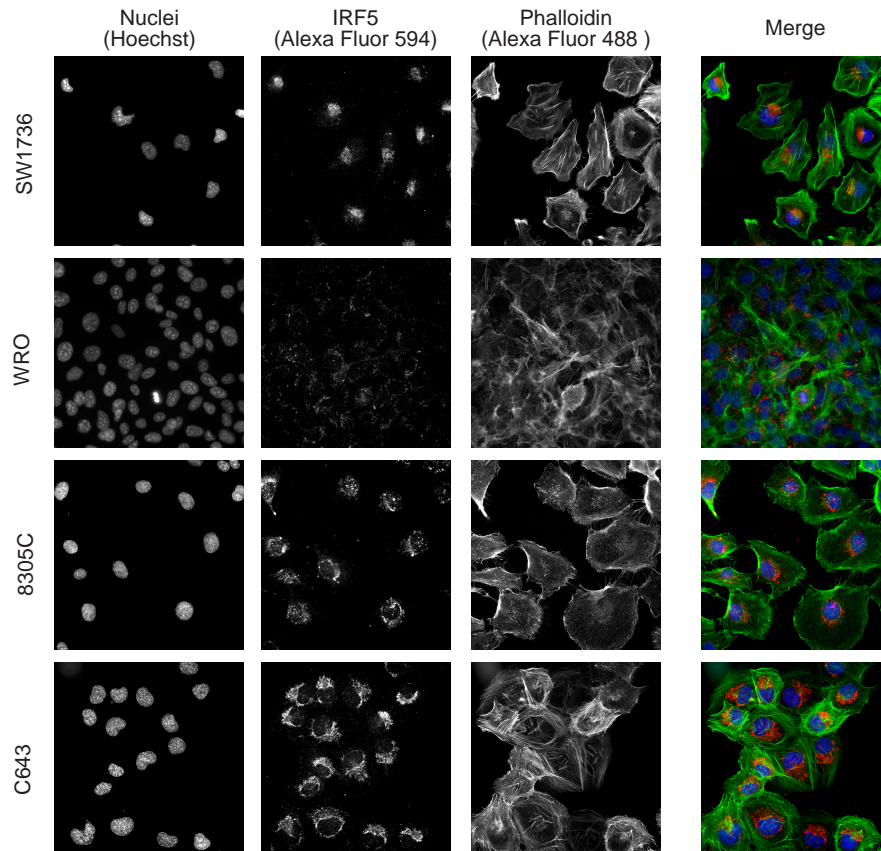

**Additional file 1. IRF5 shows cytoplasmic localization in thyroid cancer cells after IFN $\alpha$  treatment.** The specified cell lines were treated with 1000 U/mL IFN $\alpha$  for 24 hours. Cells were then labeled for IRF5 using the indicated secondary antibody. Hoechst and phalloidin were employed to stain nuclear and cytoplasmic compartments.
